# Supplementary material for: Synthesis andin vitroanti-proliferative evaluation of naphthalimide–chalcone/pyrazoline conjugates as potential SERMs with computational validation
Source: Royal Society of Chemistry journal article supplement (doi:10.1039/d0ra01822h), 2020-01-01

## Synthesis and *in-vitro* anti-proliferative evaluation of naphthalimide-chalcone/pyrazoline conjugates as potential SERMs with computational validation

Shalini,<sup>a</sup> Pankaj,<sup>a</sup> Sourav Taru Saha,<sup>b</sup> Mandeep Kaur,<sup>b</sup> Ebenezer Oluwakemi,<sup>c</sup> Paul Awolade,<sup>c</sup> Parvesh Singh,<sup>c</sup> and Vipan Kumar<sup>a\*</sup>

<sup>a</sup>Department of Chemistry, Guru Nanak Dev University, Amritsar 143005, India.

<sup>b</sup>School of Molecular and Cell Biology, University of the Witwatersrand, Private Bag 3, Wits, 2050 Johannesburg, South Africa.

<sup>c</sup>School of Chemistry and Physics, University of KwaZulu Natal, P/Bag X54001, Westville, Durban 4000, South Africa.

**Table S1:** Physicochemical and ADMET properties of compound **13f** and **13g** .

| Properties                    | Predicted values |            | Properties                    | Predicted values |               |
|-------------------------------|------------------|------------|-------------------------------|------------------|---------------|
|                               | <b>13f</b>       | <b>13g</b> |                               | <b>13f</b>       | <b>13g</b>    |
| <b>Absorption</b>             |                  |            | <b>Distribution</b>           |                  |               |
| Water solubility              | -4.269           | -4.148     | VDss (human)                  | -0.768           | -0.814        |
| Caco2 permeability            | 0.590            | 0.558      | BBB permeability              | -1.615           | -1.844        |
| Intestinal absorption (human) | 100              | 97.83      | Fraction unbound (human)      | 0.311            | 0.32          |
| P-glycoprotein I substrate    | No               | No         | CNS permeability              | -3.201           | -3.345        |
| P-glycoprotein II inhibitor   | No               | Yes        | <b>Toxicity</b>               |                  |               |
| <b>Metabolism</b>             |                  |            | Oral Rat Acute Toxicity       | 3.282            | 3.282         |
| CYP2C19 inhibitor             | Yes              | Yes        | Hepatotoxicity                | Yes              | Yes           |
| CYP2C9 inhibitor              | Yes              | Yes        | Skin Sensitisation            | No               | No            |
| CYP2D6 substrate              | Yes              | Yes        | <i>T.Pyriiformis</i> toxicity | 0.285            | 0.285         |
| CYP1A2 inhibitor              | No               | Yes        | Minnow toxicity               | -2.349           | -2.134        |
| CYP3A4 substrate              | Yes              | Yes        | <b>LogP</b>                   | <b>4.96</b>      | <b>4.98</b>   |
| <b>Excretion</b>              |                  |            | <b>TPSA</b>                   | <b>120.91</b>    | <b>130.14</b> |
| Total Clearance               | <b>0.572</b>     | 0.602      | <b>Num of HBA/HBD</b>         | <b>8/0</b>       | <b>9/0</b>    |
| Renal OCT2 substrate          | <b>No</b>        | No         | <b>Molar refractivity</b>     | <b>186.47</b>    | <b>192.96</b> |

### Scanned copies of <sup>1</sup>H and <sup>13</sup>C NMR spectra:

Scanned copies of <sup>1</sup>H and <sup>13</sup>C NMR spectra of representative compounds viz. **12b**, **12g**, **13b**, **13d**, **13g**, **14b**, **15b**.

**<sup>1</sup>H NMR of (E)-2-(2-(4-((4-(3-(4-methoxyphenyl)acryloyl)phenoxy)methyl)-1H-1,2,3-triazol-1-yl)ethyl)-1H-benzo[de]isoquinoline-1,3(2H)-dione (12b):**

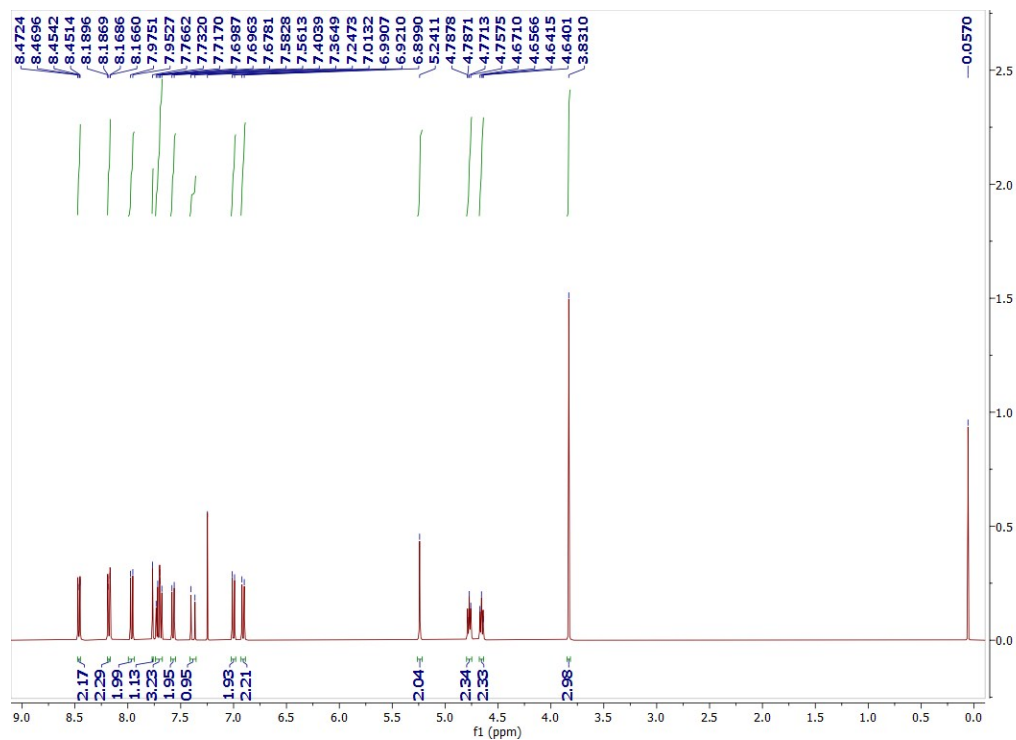

**<sup>13</sup>C NMR of (E)-2-(2-(4-((4-(3-(4-methoxyphenyl)acryloyl)phenoxy)methyl)-1H-1,2,3-triazol-1-yl)ethyl)-1H-benzo[de]isoquinoline-1,3(2H)-dione (12b):**

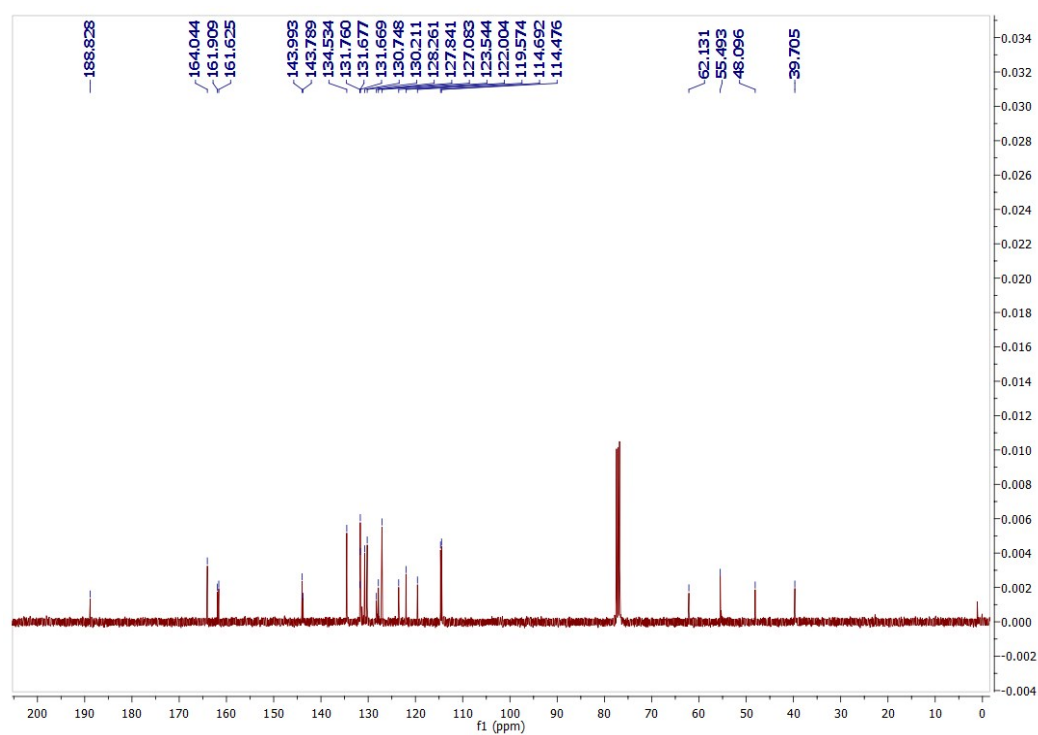

**<sup>1</sup>H NMR of (E)-2-(3-(4-((4-(3-(2,5-dimethoxyphenyl)acryloyl)phenoxy)methyl)-1H-1,2,3-triazol-1-yl)propyl)-1H-benzo[de]isoquinoline-1,3(2H)-dione (12g):**

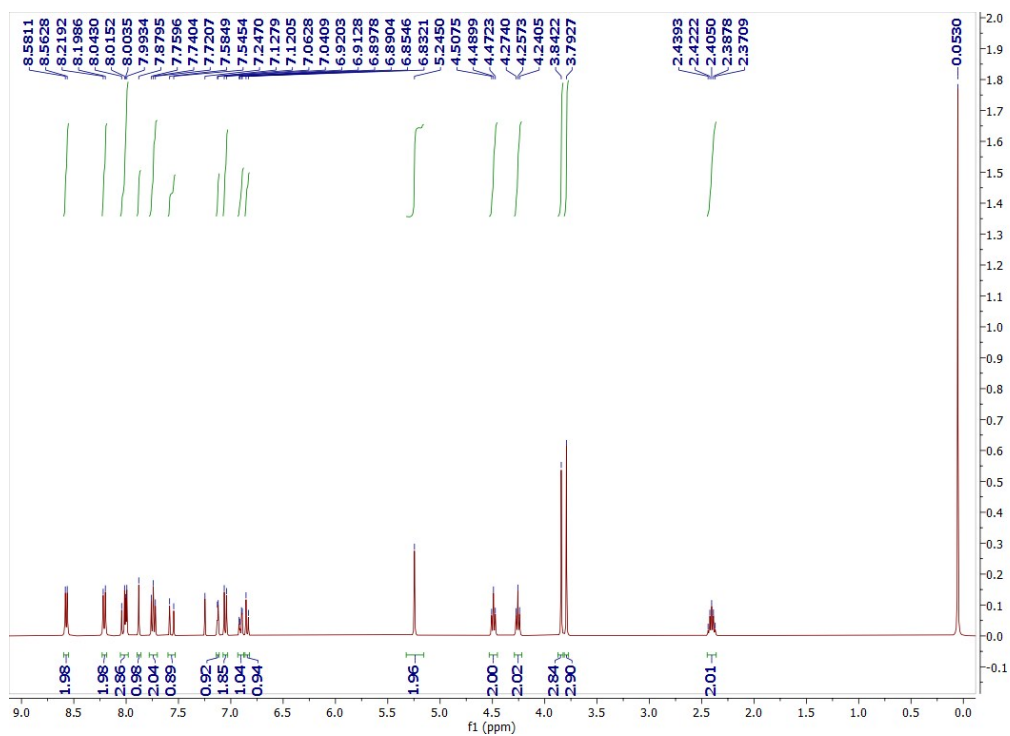

**<sup>13</sup>C NMR of (E)-2-(3-(4-((4-(3-(2,5-dimethoxyphenyl)acryloyl)phenoxy)methyl)-1H-1,2,3-triazol-1-yl)propyl)-1H-benzo[de]isoquinoline-1,3(2H)-dione (12g):**

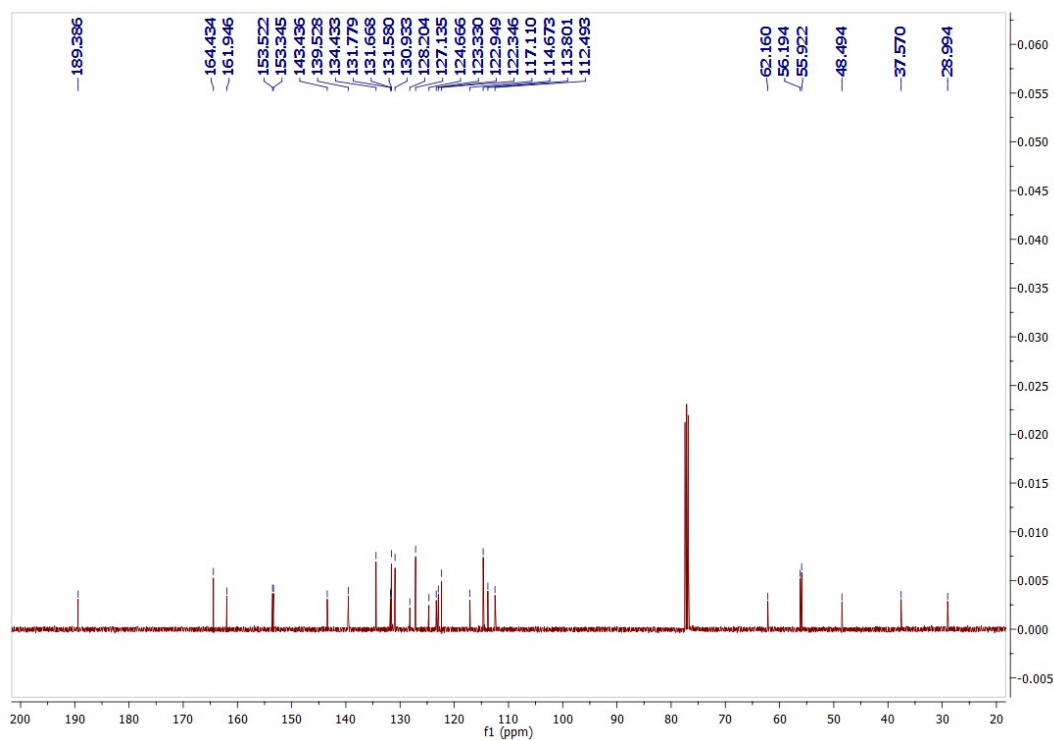

**<sup>1</sup>H NMR of 2-(2-(4-((4-(1-acetyl-5-(4-methoxyphenyl)-4,5-dihydro-1H-pyrazol-3-yl)phenoxy)methyl)-1H-1,2,3-triazol-1-yl)ethyl)-1H-benzo[de]isoquinoline-1,3(2H)-dione (13b):**

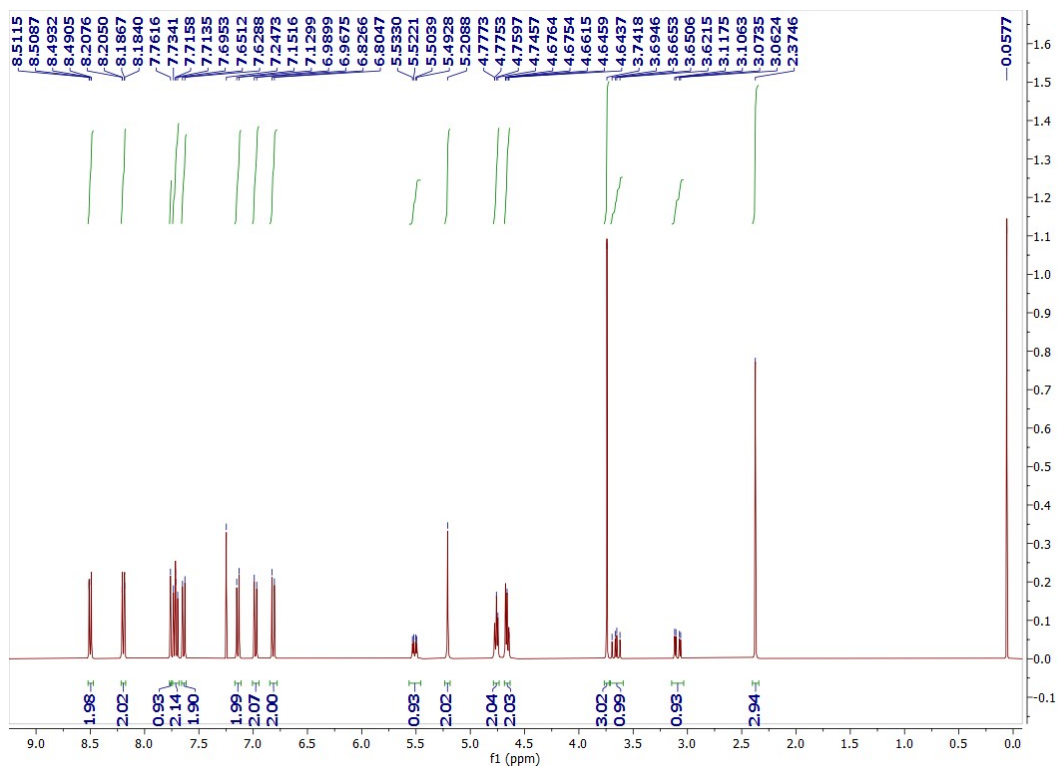

**<sup>13</sup>C NMR of 2-(2-(4-((4-(1-acetyl-5-(4-methoxyphenyl)-4,5-dihydro-1H-pyrazol-3-yl)phenoxy)methyl)-1H-1,2,3-triazol-1-yl)ethyl)-1H-benzo[de]isoquinoline-1,3(2H)-dione (13b):**

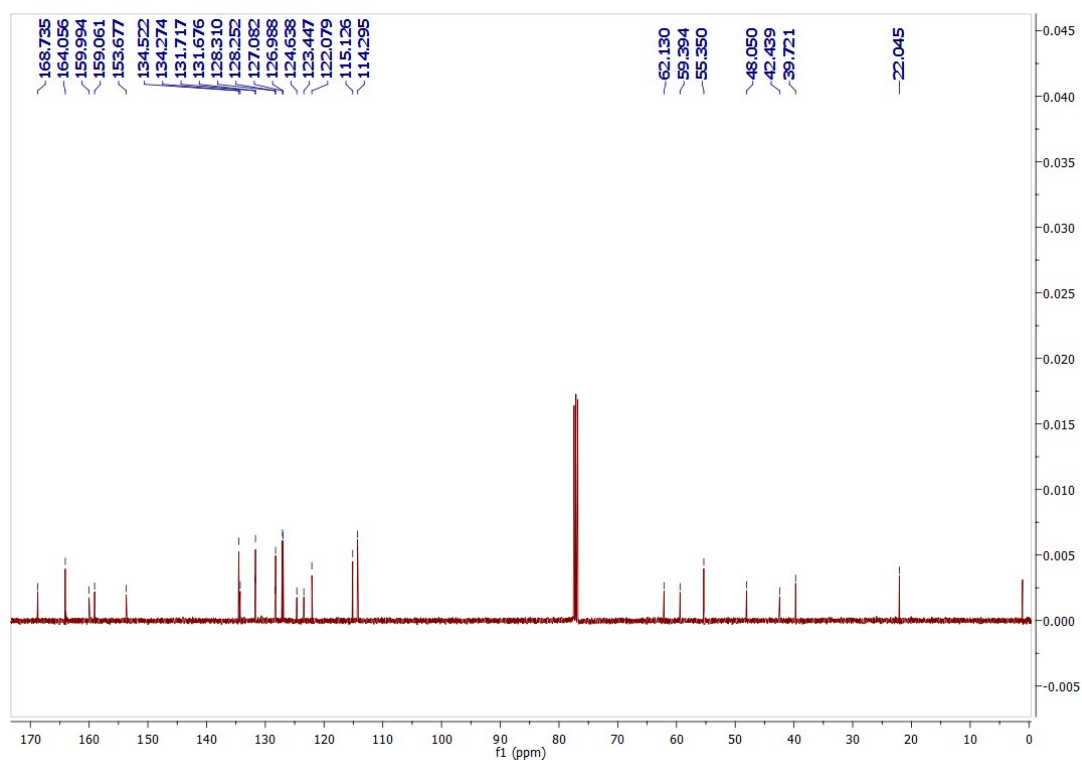

**<sup>1</sup>H NMR of 2-(2-(4-((4-(1-acetyl-5-(4-nitrophenyl)-4,5-dihydro-1H-pyrazol-3-yl)phenoxy)methyl)-1H-1,2,3-triazol-1-yl)ethyl)-1H-benzo[de]isoquinoline-1,3(2H)-dione (13d):**

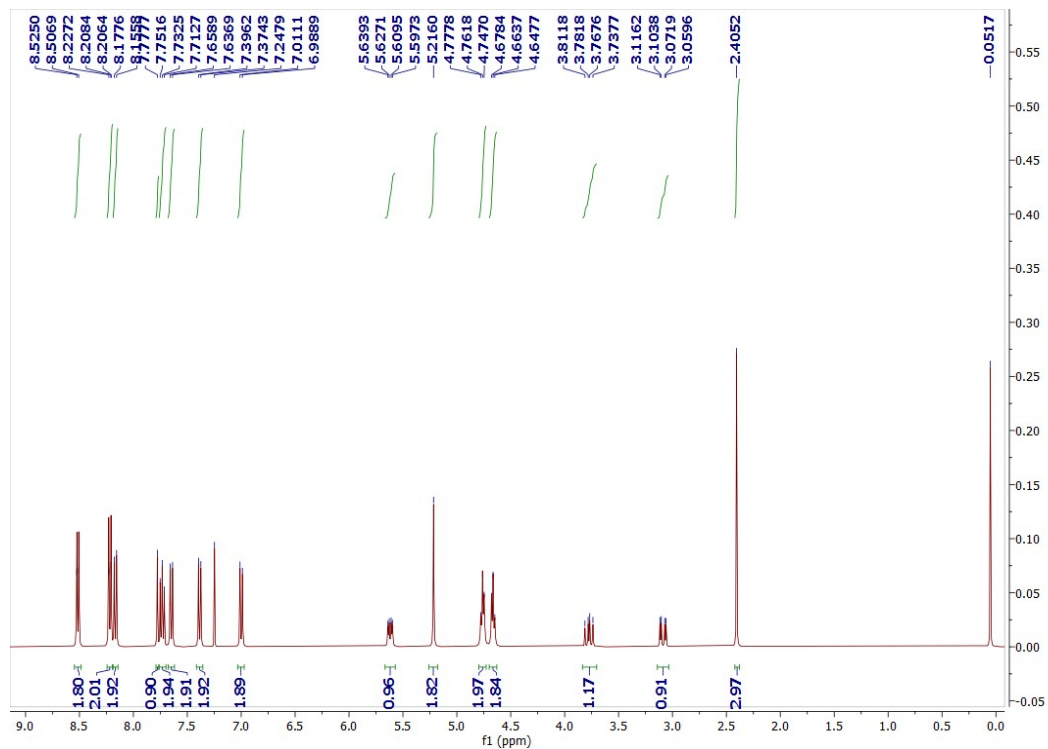

**<sup>13</sup>C NMR of 2-(2-(4-((4-(1-acetyl-5-(4-nitrophenyl)-4,5-dihydro-1H-pyrazol-3-yl)phenoxy)methyl)-1H-1,2,3-triazol-1-yl)ethyl)-1H-benzo[de]isoquinoline-1,3(2H)-dione (13d):**

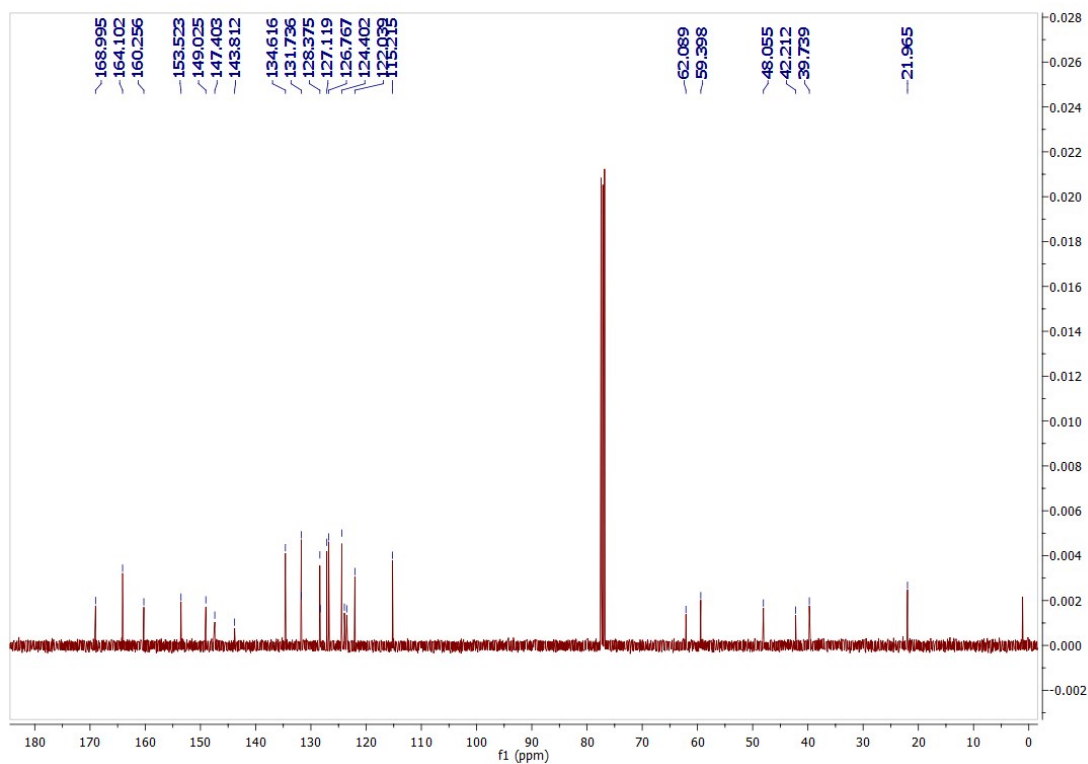

Expanded  $^{13}\text{C}$  NMR of 13d:

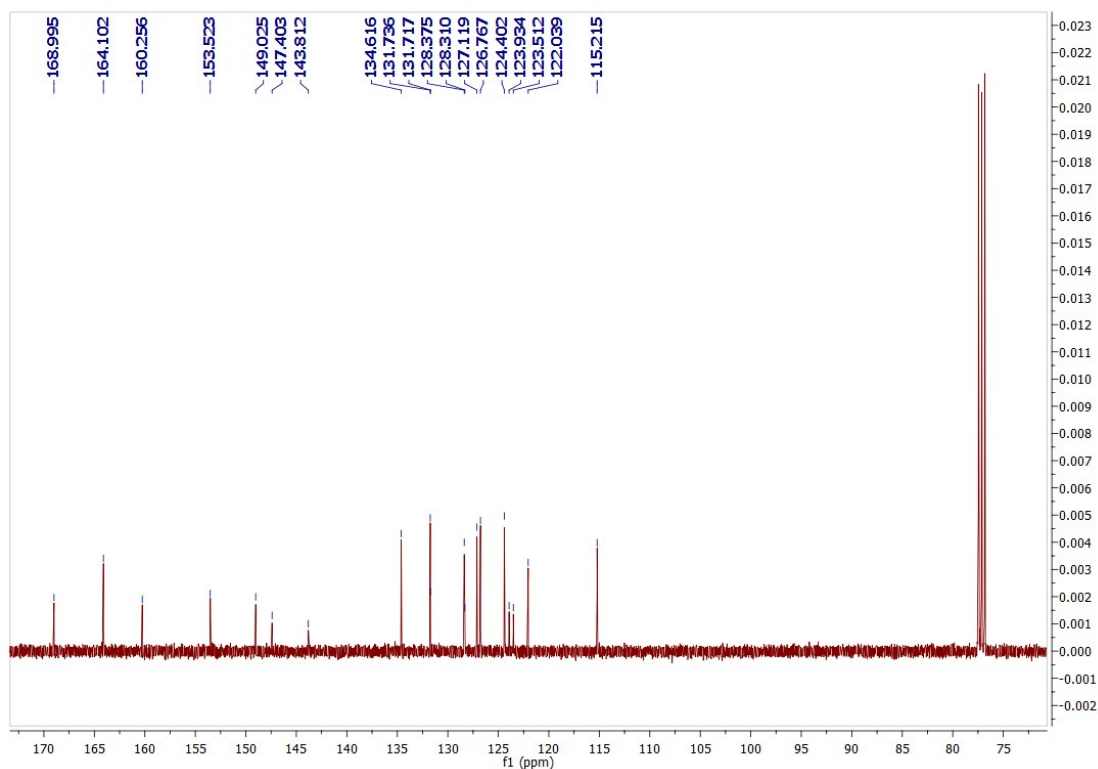

$^1\text{H}$  NMR of 2-(3-(4-((4-(1-acetyl-5-(2,5-dimethoxyphenyl)-4,5-dihydro-1H-pyrazol-3-yl)phenoxy)methyl)-1H-1,2,3-triazol-1-yl)propyl)-1H-benzo[de]isoquinoline-1,3(2H)-dione (13g):

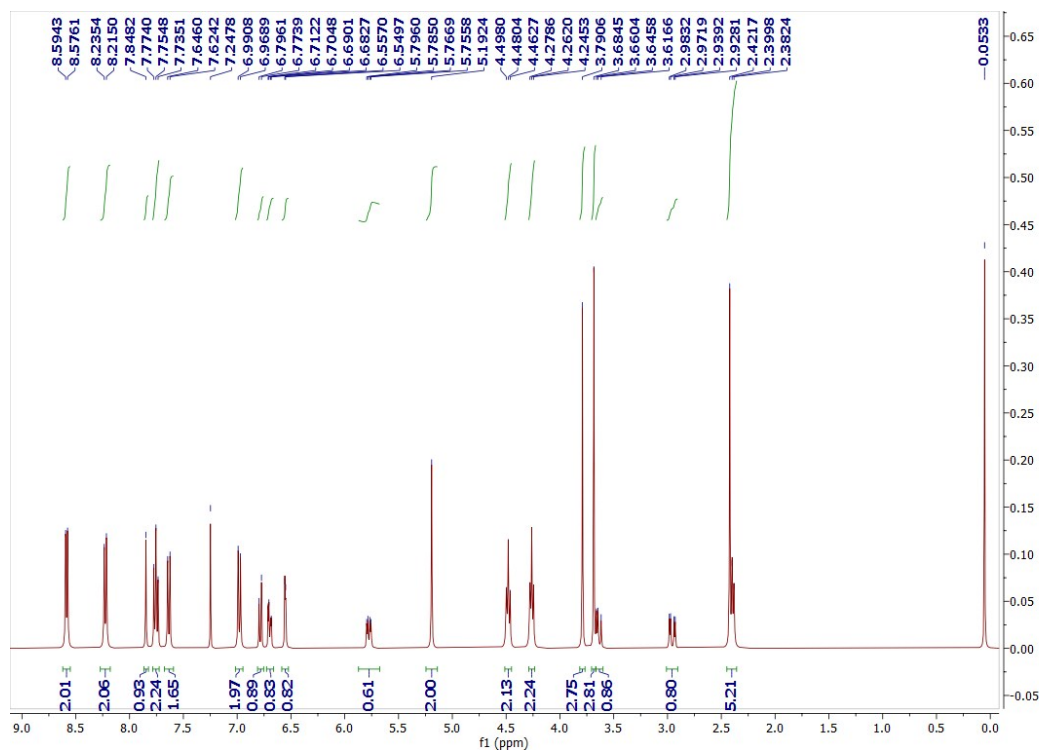

**<sup>13</sup>C NMR of 2-(3-(4-((1-acetyl-5-(2,5-dimethoxyphenyl)-4,5-dihydro-1H-pyrazol-3-yl)phenoxy)methyl)-1H-1,2,3-triazol-1-yl)propyl)-1H-benzo[de]isoquinoline-1,3(2H)-dione (13g):**

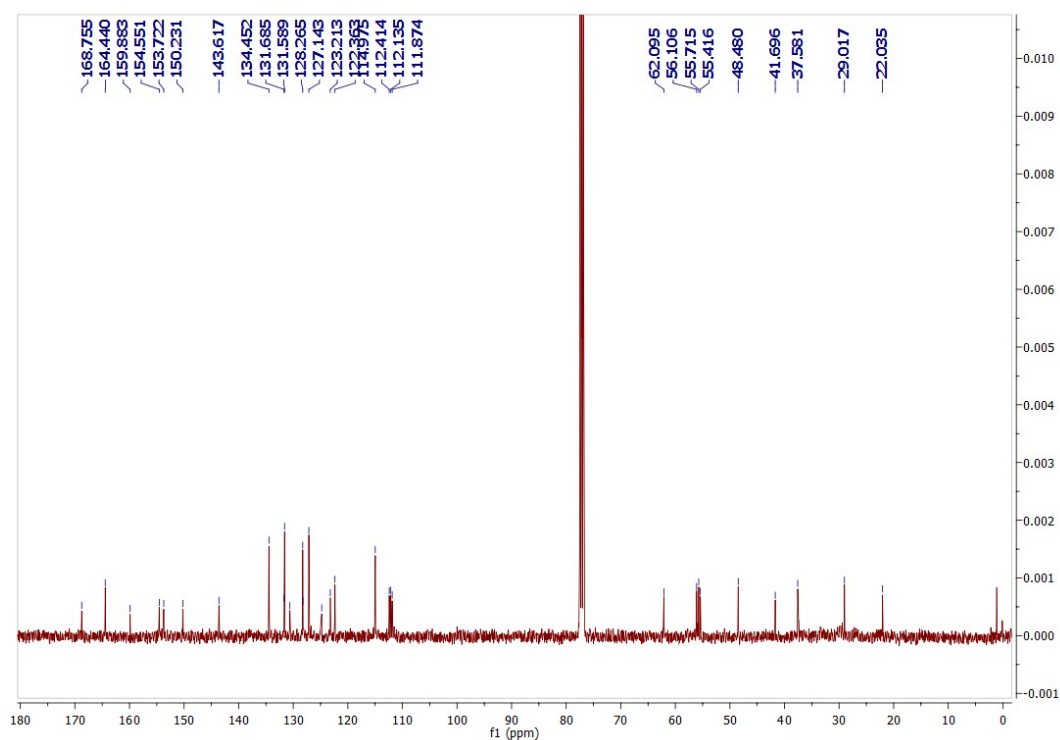

**Expanded <sup>13</sup>C NMR of 13g:**

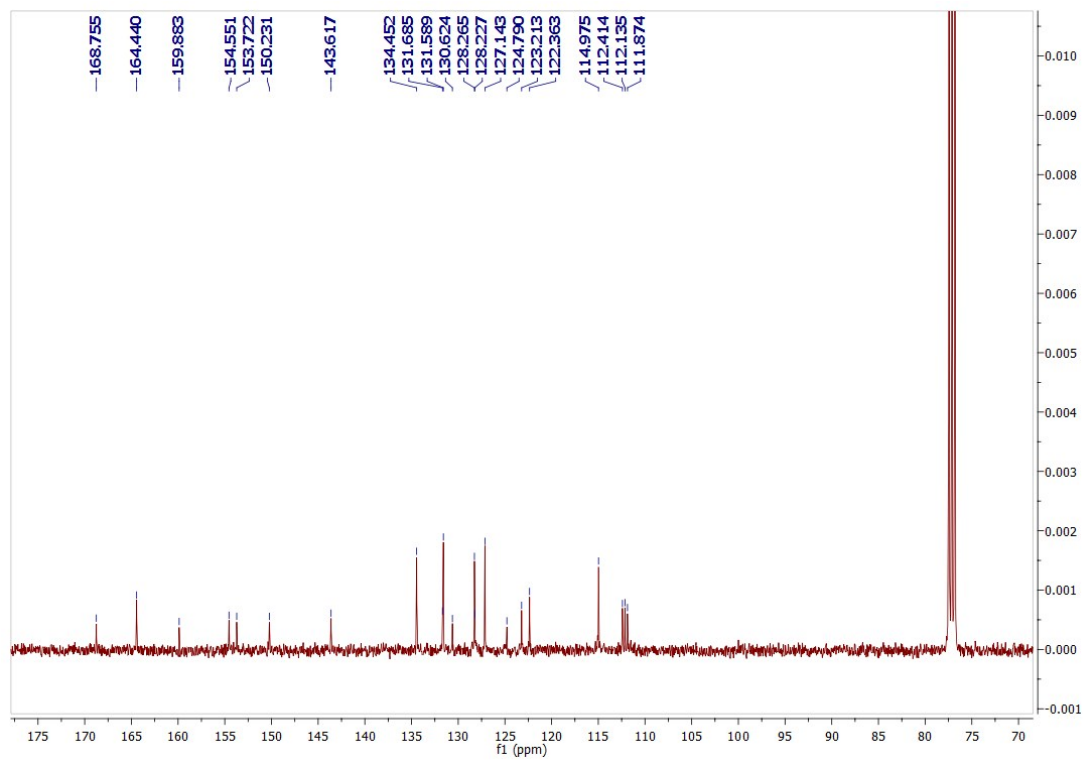

**<sup>1</sup>H NMR of (E)-2-(2-(4-((4-(3-ferrocenyl-acryloyl)phenoxy)methyl)-1H-1,2,3-triazol-1-yl)propyl)-1H-benzo[de]isoquinoline-1,3(2H)-dione (14b):**

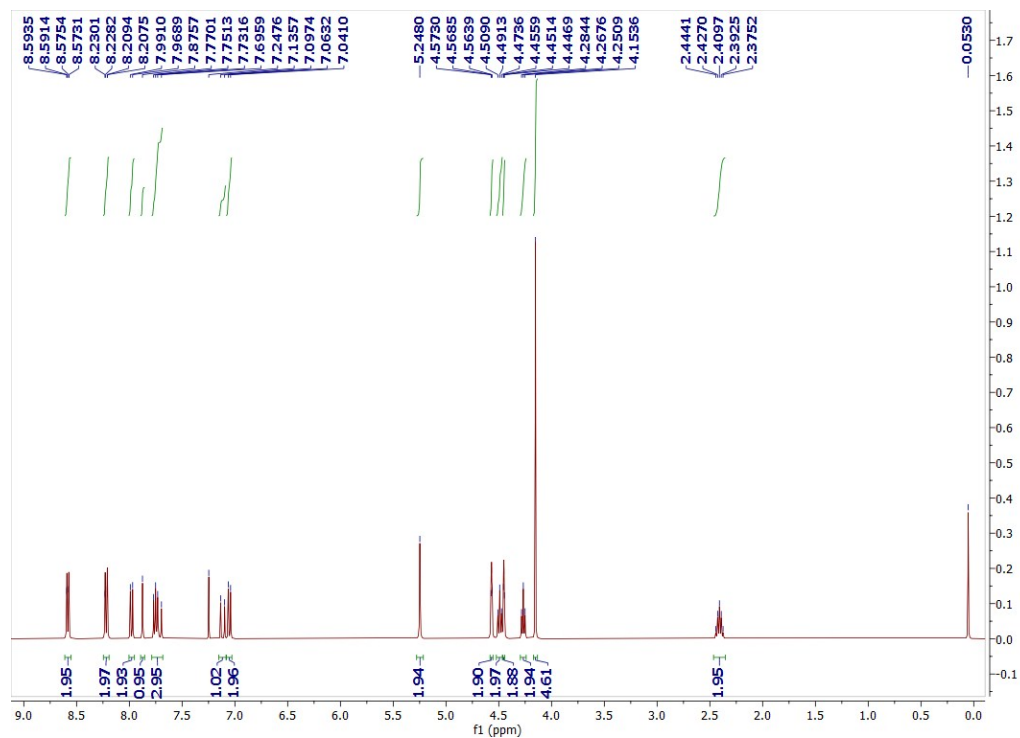

**<sup>13</sup>C NMR of (E)-2-(2-(4-((4-(3-ferrocenyl-acryloyl)phenoxy)methyl)-1H-1,2,3-triazol-1-yl)propyl)-1H-benzo[de]isoquinoline-1,3(2H)-dione (14b):**

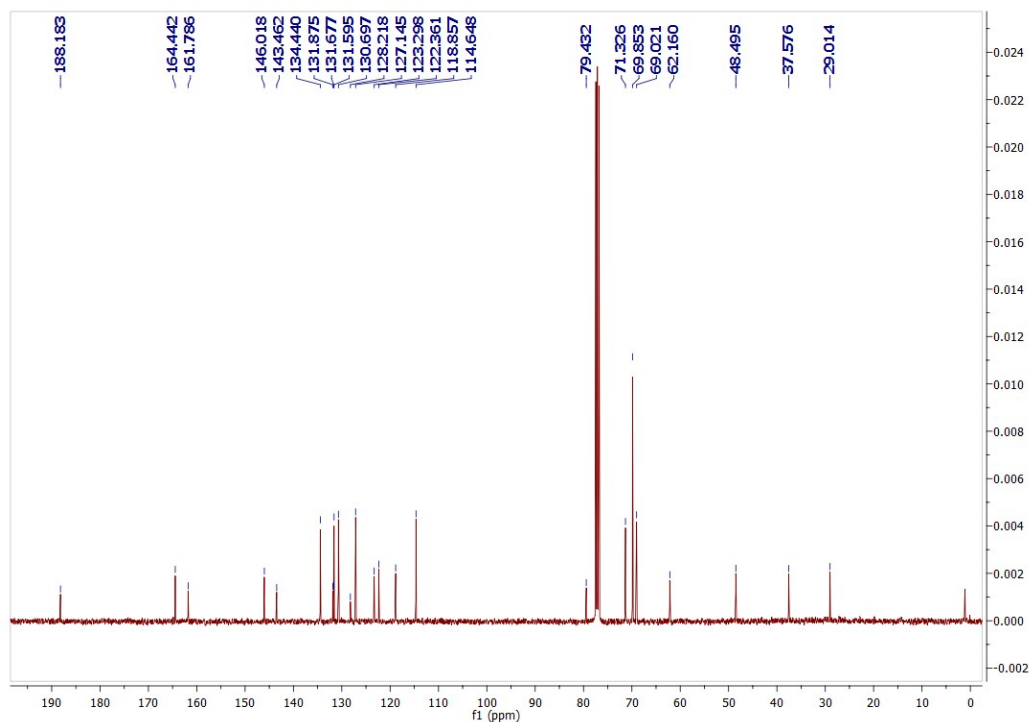



**<sup>1</sup>H NMR of 2-(2-(4-((4-(1-acetyl-5-ferrocenyl-4,5-dihydro-1H-pyrazol-3-yl)phenoxy)methyl)-1H-1,2,3-triazol-1-yl)propyl)-1H-benzo[de]isoquinoline-1,3(2H)-dione (15b):**

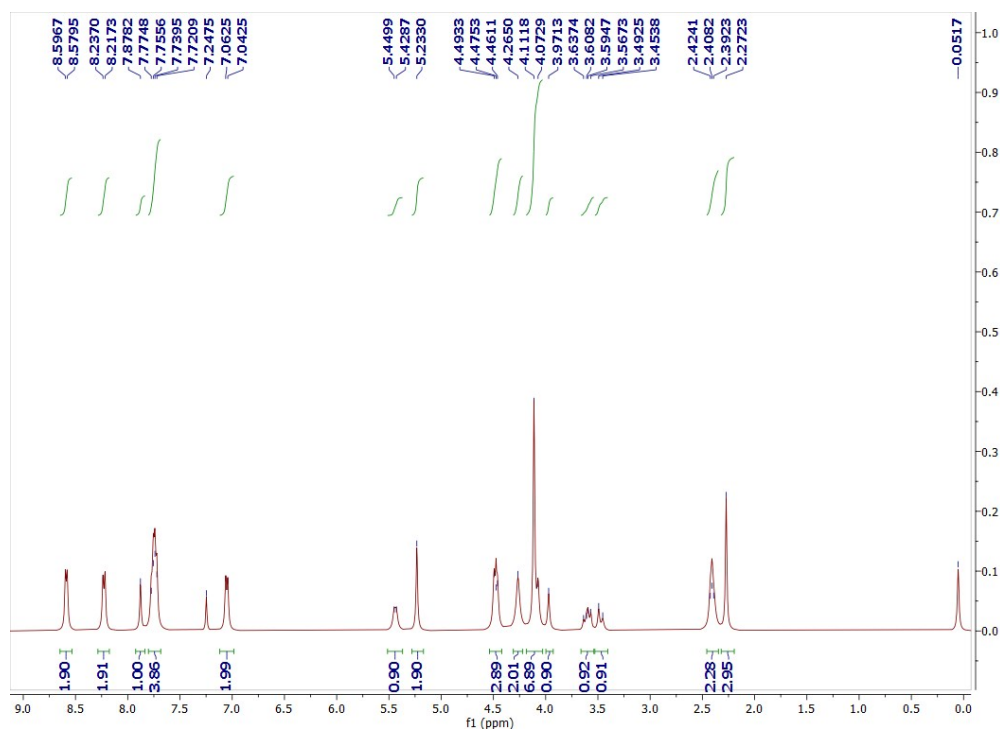

**<sup>13</sup>C NMR of 2-(2-(4-((4-(1-acetyl-5-ferrocenyl-4,5-dihydro-1H-pyrazol-3-yl)phenoxy)methyl)-1H-1,2,3-triazol-1-yl)propyl)-1H-benzo[de]isoquinoline-1,3(2H)-dione (15b):**

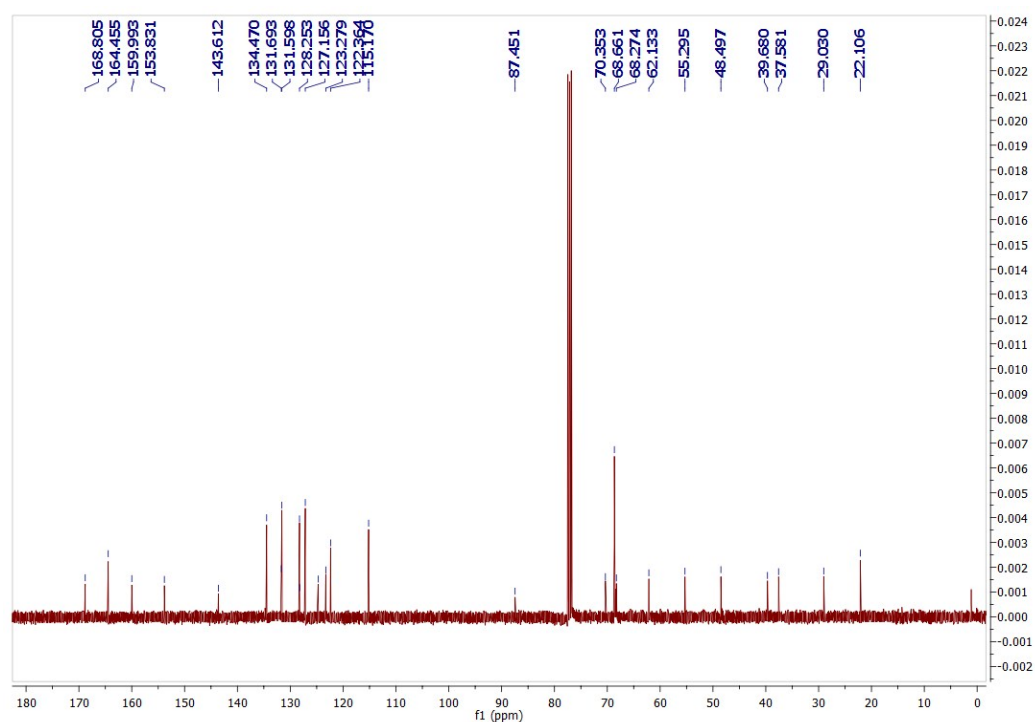

Expanded  $^{13}\text{C}$  NMR of 15b:

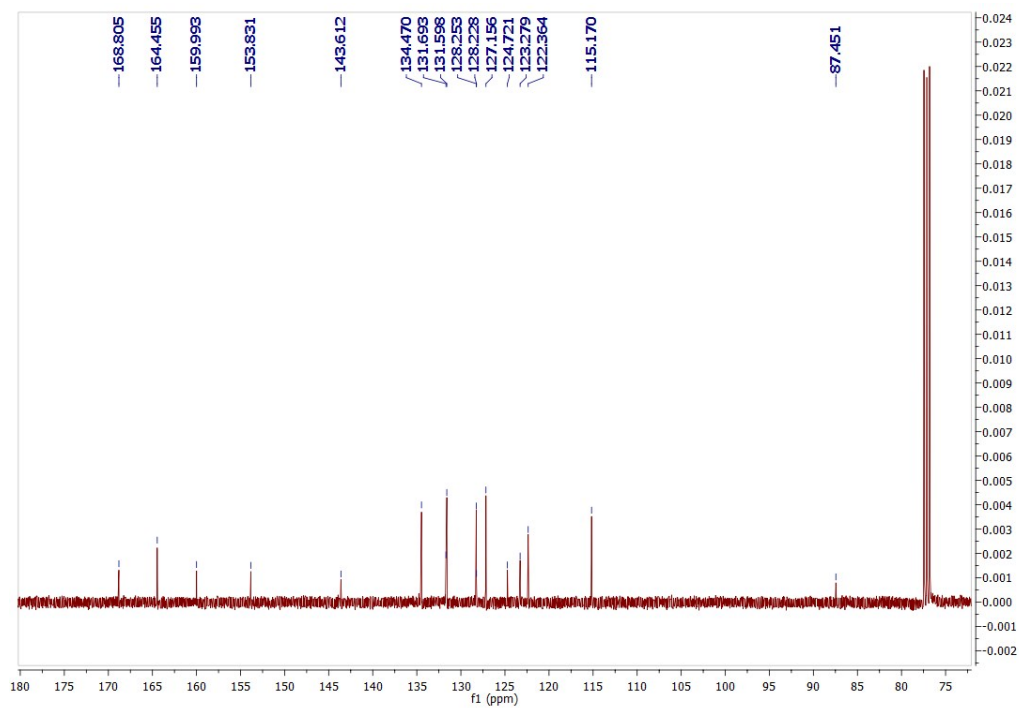

Supplement: d0ra01822h1.pdf [file d0ra01822h1.pdf]
